# Supplementary material for: Synthesis, Crystal Structure and Properties of the New Laminar Quaternary Tellurides SrLnCuTe3 (Ln = Sm, Gd–Tm and Lu)
Source: MDPI journal article supplement (doi:10.3390/cryst13020291), 2023-02-09
Supplement: s1 [file s1]

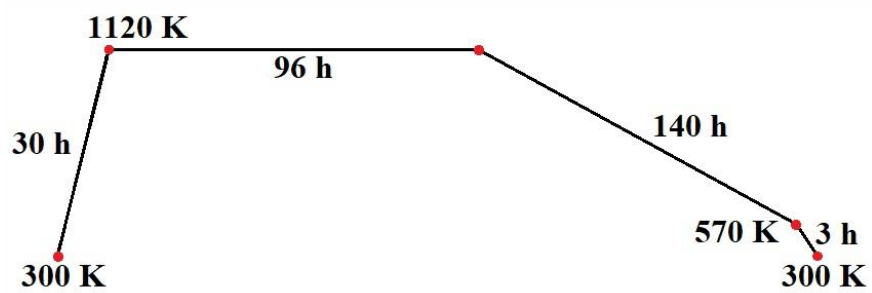

(a)

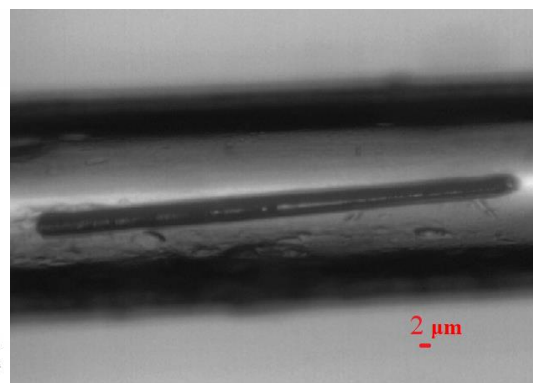

(b)

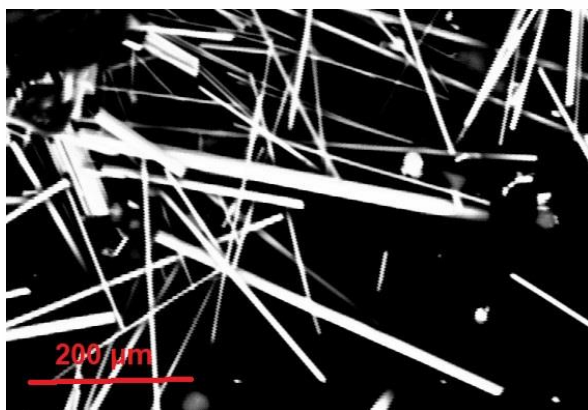

(c)

**Figure S1.** The heating profiles used for the syntheses of  $\text{SrLnCuTe}_3$  ( $\text{Ln} = \text{Sm}, \text{Gd-Tm}$  and  $\text{Lu}$ ) (a). Photograph of a  $\text{SrHoCuTe}_3$  crystal placed in a capillary for X-ray diffraction analysis (The single crystal image was made using a Horiba XploRA Raman spectrometer) (b). SEM micrograph for a  $\text{SrDyCuTe}_3$  sample (c).

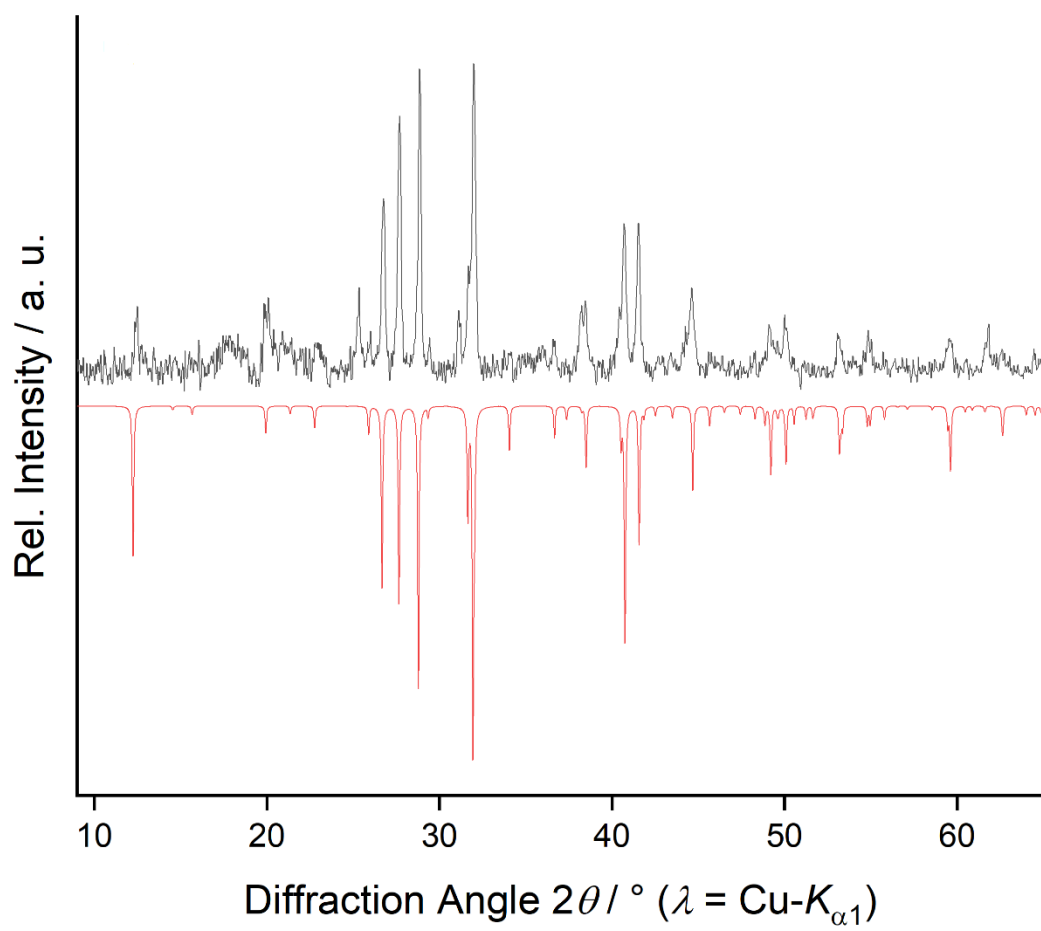

**Figure S2.** Experimental and theoretical powder X-ray diffraction pattern of SrDyCuTe<sub>3</sub>.

**Table S1.** Bond lengths ( $d/\text{\AA}$ ) in the crystal structures of the  $\text{SrRECuTe}_3$  series ( $RE = \text{Sm, Gd-Tm and Lu}$ ).

| <b>SrSmCuTe<sub>3</sub></b> |           |                        |            |                      |           |
|-----------------------------|-----------|------------------------|------------|----------------------|-----------|
| Sr—Te3 <sup>i</sup>         | 3.336(1)  | Sm—Te3                 | 3.0888(9)  | Cu—Te2               | 2.639(2)  |
| Sr—Te1 <sup>iii</sup>       | 3.364(1)  | Sm—Te2 <sup>iv</sup>   | 3.0906(8)  | Cu—Te1               | 2.666(2)  |
| Sr—Te2 <sup>iv</sup>        | 3.386(1)  | Sm—Te2 <sup>iii</sup>  | 3.0906(8)  | Cu—Te3 <sup>ii</sup> | 2.691(1)  |
| Sr—Te1 <sup>v</sup>         | 3.650(2)  | Sm—Te3 <sup>vi</sup>   | 3.0925(9)  | Cu—Te3 <sup>i</sup>  | 2.691(1)  |
| Sr—Te3 <sup>ii</sup>        | 3.336(1)  | Sm—Te1 <sup>vii</sup>  | 3.1160(8)  |                      |           |
| Sr—Te1 <sup>iv</sup>        | 3.364(1)  | Sm—Te1 <sup>viii</sup> | 3.1160(8)  |                      |           |
| Sr—Te2 <sup>iii</sup>       | 3.386(1)  |                        |            |                      |           |
| <b>SrGdCuTe<sub>3</sub></b> |           |                        |            |                      |           |
| Sr—Te3 <sup>i</sup>         | 3.331(1)  | Gd—Te3                 | 3.0711(8)  | Cu—Te2               | 2.640(2)  |
| Sr—Te3 <sup>ii</sup>        | 3.331(1)  | Gd—Te2 <sup>iv</sup>   | 3.0758(7)  | Cu—Te1               | 2.666(2)  |
| Sr—Te1 <sup>iii</sup>       | 3.368(1)  | Gd—Te2 <sup>iii</sup>  | 3.0758(7)  | Cu—Te3 <sup>ii</sup> | 2.686(1)  |
| Sr—Te1 <sup>iv</sup>        | 3.368(1)  | Gd—Te3 <sup>vi</sup>   | 3.0770(8)  | Cu—Te3 <sup>i</sup>  | 2.686(1)  |
| Sr—Te2 <sup>iv</sup>        | 3.385(1)  | Gd—Te1 <sup>vii</sup>  | 3.0955(7)  |                      |           |
| Sr—Te2 <sup>iii</sup>       | 3.385(1)  | Gd—Te1 <sup>viii</sup> | 3.0955 (7) |                      |           |
| Sr—Te1 <sup>v</sup>         | 3.668(1)  |                        |            |                      |           |
| <b>SrTbCuTe<sub>3</sub></b> |           |                        |            |                      |           |
| Sr—Te3 <sup>i</sup>         | 3.330(1)  | Tb—Te3                 | 3.059(1)   | Cu—Te3 <sup>ii</sup> | 2.682(1)  |
| Sr—Te3 <sup>ii</sup>        | 3.330(1)  | Tb—Te3 <sup>vi</sup>   | 3.062(1)   | Cu—Te3 <sup>i</sup>  | 2.682(1)  |
| Sr—Te1 <sup>iii</sup>       | 3.369(1)  | Tb—Te2 <sup>iv</sup>   | 3.0683(8)  | Cu—Te2               | 2.639(2)  |
| Sr—Te1 <sup>iv</sup>        | 3.369(1)  | Tb—Te2 <sup>iii</sup>  | 3.0683(8)  | Cu—Te1               | 2.661(2)  |
| Sr—Te2 <sup>iv</sup>        | 3.383(1)  | Tb—Te1 <sup>vii</sup>  | 3.0831(8)  |                      |           |
| Sr—Te2 <sup>iii</sup>       | 3.383(1)  | Tb—Te1 <sup>viii</sup> | 3.0831(8)  |                      |           |
| Sr—Te1 <sup>v</sup>         | 3.693(2)  |                        |            |                      |           |
| <b>SrDyCuTe<sub>3</sub></b> |           |                        |            |                      |           |
| Sr—Te1 <sup>i</sup>         | 3.321(1)  | Dy—Te2 <sup>vi</sup>   | 3.0643(5)  | Cu—Te2               | 2.649(1)  |
| Sr—Te1 <sup>ii</sup>        | 3.321(1)  | Dy—Te1 <sup>v</sup>    | 3.0484(3)  | Cu—Te2 <sup>x</sup>  | 2.649(1)  |
| Sr—Te2 <sup>iii</sup>       | 3.3775(8) | Dy—Te1                 | 3.0484(3)  | Cu—Te1 <sup>ii</sup> | 2.677(1)  |
| Sr—Te2 <sup>i</sup>         | 3.3775(8) | Dy—Te2 <sup>vii</sup>  | 3.0643(5)  | Cu—Te1 <sup>i</sup>  | 2.677(1)  |
| Sr—Te2 <sup>iv</sup>        | 3.3775(8) | Dy—Te2 <sup>viii</sup> | 3.0643(5)  |                      |           |
| Sr—Te2 <sup>ii</sup>        | 3.3775(8) | Dy—Te2 <sup>ix</sup>   | 3.0643(5)  |                      |           |
| <b>SrHoCuTe<sub>3</sub></b> |           |                        |            |                      |           |
| Sr—Te1 <sup>i</sup>         | 3.3205(9) | Ho—Te2 <sup>vi</sup>   | 3.0541(3)  | Cu—Te2               | 2.6462(9) |
| Sr—Te1 <sup>ii</sup>        | 3.3205(9) | Ho—Te1 <sup>v</sup>    | 3.0375(3)  | Cu—Te2 <sup>x</sup>  | 2.6463(9) |
| Sr—Te2 <sup>iii</sup>       | 3.3759(6) | Ho—Te1                 | 3.0376(3)  | Cu—Te1 <sup>ii</sup> | 2.6739(9) |
| Sr—Te2 <sup>i</sup>         | 3.3759(6) | Ho—Te2 <sup>vii</sup>  | 3.0541(3)  | Cu—Te1 <sup>i</sup>  | 2.6739(9) |
| Sr—Te2 <sup>ii</sup>        | 3.3759(6) | Ho—Te2 <sup>viii</sup> | 3.0541(3)  |                      |           |
| Sr—Te2 <sup>iv</sup>        | 3.3759(6) | Ho—Te2 <sup>ix</sup>   | 3.0541(3)  |                      |           |
| <b>SrErCuTe<sub>3</sub></b> |           |                        |            |                      |           |
| Sr—Te1 <sup>i</sup>         | 3.321(1)  | Er—Te2 <sup>vi</sup>   | 3.0465(4)  | Cu—Te2               | 2.646(1)  |
| Sr—Te1 <sup>ii</sup>        | 3.321(1)  | Er—Te1 <sup>v</sup>    | 3.0276(3)  | Cu—Te2 <sup>x</sup>  | 2.646(1)  |
| Sr—Te2 <sup>iii</sup>       | 3.3775(7) | Er—Te1                 | 3.0277(3)  | Cu—Te1 <sup>ii</sup> | 2.670(1)  |
| Sr—Te2 <sup>i</sup>         | 3.3775(7) | Er—Te2 <sup>vii</sup>  | 3.0465(4)  | Cu—Te1 <sup>i</sup>  | 2.670(1)  |
| Sr—Te2 <sup>ii</sup>        | 3.3775(7) | Er—Te2 <sup>viii</sup> | 3.0465(4)  |                      |           |
| Sr—Te2 <sup>iv</sup>        | 3.3775(7) | Er—Te2 <sup>ix</sup>   | 3.0465(4)  |                      |           |
| <b>SrTmCuTe<sub>3</sub></b> |           |                        |            |                      |           |
| Sr—Te1 <sup>i</sup>         | 3.323(1)  | Tm—Te2 <sup>vi</sup>   | 3.0382(3)  | Cu—Te2               | 2.6440(9) |
| Sr—Te1 <sup>ii</sup>        | 3.323(1)  | Tm—Te1                 | 3.0204(3)  | Cu—Te2 <sup>x</sup>  | 2.6440(9) |
| Sr—Te2 <sup>iii</sup>       | 3.3767(6) | Tm—Te1 <sup>v</sup>    | 3.0204(3)  | Cu—Te1 <sup>ii</sup> | 2.6662(9) |
| Sr—Te2 <sup>i</sup>         | 3.3767(6) | Tm—Te2 <sup>vii</sup>  | 3.0382(3)  | Cu—Te1 <sup>i</sup>  | 2.6662(9) |
| Sr—Te2 <sup>iv</sup>        | 3.3767(6) | Tm—Te2 <sup>viii</sup> | 3.0382(3)  |                      |           |
| Sr—Te2 <sup>ii</sup>        | 3.3767(6) | Tm—Te2 <sup>ix</sup>   | 3.0382(3)  |                      |           |

| SrLuCuTe <sub>3</sub> |           |                        |           |                      |          |
|-----------------------|-----------|------------------------|-----------|----------------------|----------|
| Sr—Te1 <sup>i</sup>   | 3.322(1)  | Lu—Te1                 | 3.0073(4) | Cu—Te2               | 2.642(1) |
| Sr—Te1 <sup>ii</sup>  | 3.322(1)  | Lu—Te1 <sup>v</sup>    | 3.0073(4) | Cu—Te2 <sup>x</sup>  | 2.642(1) |
| Sr—Te2 <sup>iii</sup> | 3.3778(8) | Lu—Te2 <sup>vi</sup>   | 3.0229(4) | Cu—Te1 <sup>ii</sup> | 2.661(1) |
| Sr—Te2 <sup>i</sup>   | 3.3778(8) | Lu—Te2 <sup>vii</sup>  | 3.0229(4) | Cu—Te1 <sup>i</sup>  | 2.661(1) |
| Sr—Te2 <sup>iv</sup>  | 3.3778(8) | Lu—Te2 <sup>viii</sup> | 3.0229(4) |                      |          |
| Sr—Te2 <sup>ii</sup>  | 3.3778(8) | Lu—Te2 <sup>ix</sup>   | 3.0229(4) |                      |          |

**Table S2.** Bond angles ( $\angle /^\circ$ ) in the crystal structures of the SrRECuTe<sub>3</sub> series (RE = Sm, Gd–Tm and Lu).

| SrSmCuTe <sub>3</sub>                                                                                                                                                                                                               |           |                                            |           |                                        |           |
|-------------------------------------------------------------------------------------------------------------------------------------------------------------------------------------------------------------------------------------|-----------|--------------------------------------------|-----------|----------------------------------------|-----------|
| Te3 <sup>i</sup> —Sr—Te3 <sup>iii</sup>                                                                                                                                                                                             | 81.85(4)  | Te3—Sm—Te2 <sup>iv</sup>                   | 91.75(2)  | Te2—Cu—Te1                             | 103.24(7) |
| Te3 <sup>i</sup> —Sr—Te1 <sup>iii</sup>                                                                                                                                                                                             | 147.10(4) | Te3—Sm—Te2 <sup>iii</sup>                  | 91.75(2)  | Te2—Cu—Te3 <sup>ii</sup>               | 112.67(4) |
| Te3 <sup>ii</sup> —Sr—Te1 <sup>iii</sup>                                                                                                                                                                                            | 89.34(2)  | Te2 <sup>iv</sup> —Sm—Te2 <sup>iii</sup>   | 90.00(3)  | Te1—Cu—Te3 <sup>ii</sup>               | 109.77(4) |
| Te3 <sup>i</sup> —Sr—Te1 <sup>iv</sup>                                                                                                                                                                                              | 89.34(2)  | Te3—Sm—Te3 <sup>vi</sup>                   | 177.04(3) | Te2—Cu—Te3 <sup>i</sup>                | 112.67(4) |
| Te3 <sup>ii</sup> —Sr—Te1 <sup>iv</sup>                                                                                                                                                                                             | 147.10(4) | Te2 <sup>iv</sup> —Sm—Te3 <sup>vi</sup>    | 90.34(2)  | Te1—Cu—Te3 <sup>i</sup>                | 109.77(4) |
| Te1 <sup>iii</sup> —Sr—Te1 <sup>iv</sup>                                                                                                                                                                                            | 81.03(3)  | Te2 <sup>iii</sup> —Sm—Te3 <sup>vi</sup>   | 90.34(2)  | Te3 <sup>ii</sup> —Cu—Te3 <sup>i</sup> | 108.61(7) |
| Te3 <sup>i</sup> —Sr—Te2 <sup>iv</sup>                                                                                                                                                                                              | 80.20(2)  | Te3—Sm—Te1 <sup>vii</sup>                  | 88.10(2)  |                                        |           |
| Te3 <sup>ii</sup> —Sr—Te2 <sup>iv</sup>                                                                                                                                                                                             | 132.49(4) | Te2 <sup>iv</sup> —Sm—Te1 <sup>vii</sup>   | 179.52(2) |                                        |           |
| Te1 <sup>iii</sup> —Sr—Te2 <sup>iv</sup>                                                                                                                                                                                            | 126.72(5) | Te2 <sup>iii</sup> —Sm—Te1 <sup>vii</sup>  | 90.47(2)  |                                        |           |
| Te1 <sup>iv</sup> —Sr—Te2 <sup>iv</sup>                                                                                                                                                                                             | 76.08(2)  | Te3 <sup>vi</sup> —Sm—Te1 <sup>vii</sup>   | 89.79(2)  |                                        |           |
| Te3 <sup>i</sup> —Sr—Te2 <sup>iii</sup>                                                                                                                                                                                             | 132.49(4) | Te3—Sm—Te1 <sup>viii</sup>                 | 88.10(2)  |                                        |           |
| Te3 <sup>ii</sup> —Sr—Te2 <sup>iii</sup>                                                                                                                                                                                            | 80.20(2)  | Te2 <sup>iv</sup> —Sm—Te1 <sup>viii</sup>  | 90.47(2)  |                                        |           |
| Te1 <sup>iii</sup> —Sr—Te2 <sup>iii</sup>                                                                                                                                                                                           | 76.08(2)  | Te2 <sup>iii</sup> —Sm—Te1 <sup>viii</sup> | 179.52(2) |                                        |           |
| Te1 <sup>iv</sup> —Sr—Te2 <sup>iii</sup>                                                                                                                                                                                            | 126.72(5) | Te3 <sup>vi</sup> —Sm—Te1 <sup>viii</sup>  | 89.79(2)  |                                        |           |
| Te2 <sup>iv</sup> —Sr—Te2 <sup>iii</sup>                                                                                                                                                                                            | 80.40(3)  | Te1 <sup>vii</sup> —Sm—Te1 <sup>viii</sup> | 89.06(3)  |                                        |           |
| Te3 <sup>i</sup> —Sr—Te1 <sup>v</sup>                                                                                                                                                                                               | 76.12(3)  |                                            |           |                                        |           |
| Te3 <sup>ii</sup> —Sr—Te1 <sup>v</sup>                                                                                                                                                                                              | 76.12(3)  |                                            |           |                                        |           |
| Te1 <sup>iii</sup> —Sr—Te1 <sup>v</sup>                                                                                                                                                                                             | 70.99(3)  |                                            |           |                                        |           |
| Te1 <sup>iv</sup> —Sr—Te1 <sup>v</sup>                                                                                                                                                                                              | 70.99(3)  |                                            |           |                                        |           |
| Te2 <sup>iv</sup> —Sr—Te1 <sup>v</sup>                                                                                                                                                                                              | 139.23(2) |                                            |           |                                        |           |
| Te2 <sup>iii</sup> —Sr—Te1 <sup>v</sup>                                                                                                                                                                                             | 139.23(2) |                                            |           |                                        |           |
| Symmetry codes: (i) $-x+1/2, -y, z-1/2$ ; (ii) $-x+1/2, -y+1, z-1/2$ ; (iii) $-x+1/2, -y+1, z+1/2$ ; (iv) $-x+1/2, -y, z+1/2$ ; (v) $x+1/2, y, -z+1/2$ ; (vi) $x-1/2, y, -z+3/2$ ; (vii) $-x, -y+1, -z+1$ ; (viii) $-x, -y, -z+1$ . |           |                                            |           |                                        |           |
| SrGdCuTe <sub>3</sub>                                                                                                                                                                                                               |           |                                            |           |                                        |           |
| Te3 <sup>i</sup> —Sr—Te3 <sup>iii</sup>                                                                                                                                                                                             | 81.62(3)  | Te3—Gd—Te2 <sup>iv</sup>                   | 92.21(2)  | Te2—Cu—Te1                             | 103.84(6) |
| Te3 <sup>i</sup> —Sr—Te1 <sup>iii</sup>                                                                                                                                                                                             | 145.93(4) | Te3—Gd—Te2 <sup>iii</sup>                  | 92.21(2)  | Te2—Cu—Te3 <sup>ii</sup>               | 112.56(3) |
| Te3 <sup>ii</sup> —Sr—Te1 <sup>iii</sup>                                                                                                                                                                                            | 89.06(2)  | Te2 <sup>iv</sup> —Gd—Te2 <sup>iii</sup>   | 90.10(3)  | Te1—Cu—Te3 <sup>ii</sup>               | 109.76(3) |
| Te3 <sup>i</sup> —Sr—Te1 <sup>iv</sup>                                                                                                                                                                                              | 89.06(2)  | Te3—Gd—Te3 <sup>vi</sup>                   | 177.69(2) | Te2—Cu—Te3 <sup>i</sup>                | 112.56(3) |
| Te3 <sup>ii</sup> —Sr—Te1 <sup>iv</sup>                                                                                                                                                                                             | 145.93(4) | Te2 <sup>iv</sup> —Gd—Te3 <sup>vi</sup>    | 89.42(2)  | Te1—Cu—Te3 <sup>i</sup>                | 109.76(3) |
| Te1 <sup>iii</sup> —Sr—Te1 <sup>iv</sup>                                                                                                                                                                                            | 80.52(3)  | Te2 <sup>iii</sup> —Gd—Te3 <sup>vi</sup>   | 89.42(2)  | Te3 <sup>ii</sup> —Cu—Te3 <sup>i</sup> | 108.28(6) |
| Te3 <sup>i</sup> —Sr—Te2 <sup>iv</sup>                                                                                                                                                                                              | 81.15(2)  | Te3—Gd—Te1 <sup>vii</sup>                  | 88.02(2)  |                                        |           |
| Te3 <sup>ii</sup> —Sr—Te2 <sup>iv</sup>                                                                                                                                                                                             | 133.37(4) | Te2 <sup>iv</sup> —Gd—Te1 <sup>vii</sup>   | 179.56(2) |                                        |           |
| Te1 <sup>iii</sup> —Sr—Te2 <sup>iv</sup>                                                                                                                                                                                            | 126.58(4) | Te2 <sup>iii</sup> —Gd—Te1 <sup>vii</sup>  | 90.27(1)  |                                        |           |
| Te1 <sup>iv</sup> —Sr—Te2 <sup>iv</sup>                                                                                                                                                                                             | 76.40(2)  | Te3 <sup>vi</sup> —Gd—Te1 <sup>vii</sup>   | 90.33(2)  |                                        |           |
| Te3 <sup>i</sup> —Sr—Te2 <sup>iii</sup>                                                                                                                                                                                             | 133.37(4) | Te3—Gd—Te1 <sup>viii</sup>                 | 88.02(2)  |                                        |           |
| Te3 <sup>ii</sup> —Sr—Te2 <sup>iii</sup>                                                                                                                                                                                            | 81.15(2)  | Te2 <sup>iv</sup> —Gd—Te1 <sup>viii</sup>  | 90.27(1)  |                                        |           |
| Te1 <sup>iii</sup> —Sr—Te2 <sup>iii</sup>                                                                                                                                                                                           | 76.40(2)  | Te2 <sup>iii</sup> —Gd—Te1 <sup>viii</sup> | 179.56(2) |                                        |           |
| Te1 <sup>iv</sup> —Sr—Te2 <sup>iii</sup>                                                                                                                                                                                            | 126.58(4) | Te3 <sup>vi</sup> —Gd—Te1 <sup>viii</sup>  | 90.33(2)  |                                        |           |
| Te2 <sup>iv</sup> —Sr—Te2 <sup>iii</sup>                                                                                                                                                                                            | 80.04(3)  | Te1 <sup>vii</sup> —Gd—Te1 <sup>viii</sup> | 89.37(2)  |                                        |           |
| Te3 <sup>i</sup> —Sr—Te1 <sup>v</sup>                                                                                                                                                                                               | 75.32(2)  |                                            |           |                                        |           |
| Te3 <sup>ii</sup> —Sr—Te1 <sup>v</sup>                                                                                                                                                                                              | 75.32(2)  |                                            |           |                                        |           |
| Te1 <sup>iii</sup> —Sr—Te1 <sup>v</sup>                                                                                                                                                                                             | 70.62(2)  |                                            |           |                                        |           |
| Te1 <sup>iv</sup> —Sr—Te1 <sup>v</sup>                                                                                                                                                                                              | 70.62(2)  |                                            |           |                                        |           |
| Te2 <sup>iv</sup> —Sr—Te1 <sup>v</sup>                                                                                                                                                                                              | 139.35(1) |                                            |           |                                        |           |
| Te2 <sup>iii</sup> —Sr—Te1 <sup>v</sup>                                                                                                                                                                                             | 139.35(1) |                                            |           |                                        |           |
| Symmetry codes: (i) $-x+1/2, -y, z-1/2$ ; (ii) $-x+1/2, -y+1, z-1/2$ ; (iii) $-x+1/2, -y+1, z+1/2$ ; (iv) $-x+1/2, -y, z+1/2$ ; (v) $x+1/2, y, -z+1/2$ ; (vi) $x-1/2, y, -z+3/2$ ; (vii) $-x, -y+1, -z+1$ ; (viii) $-x, -y, -z+1$ . |           |                                            |           |                                        |           |
| SrTbCuTe <sub>3</sub>                                                                                                                                                                                                               |           |                                            |           |                                        |           |
| Te3 <sup>i</sup> —Sr—Te3 <sup>iii</sup>                                                                                                                                                                                             | 81.54(4)  | Te3—Tb—Te3 <sup>vi</sup>                   | 178.11(3) | Te2—Cu—Te1                             | 104.28(7) |
| Te3 <sup>i</sup> —Sr—Te1 <sup>iii</sup>                                                                                                                                                                                             | 144.80(5) | Te3—Tb—Te2 <sup>iv</sup>                   | 92.28(2)  | Te2—Cu—Te3 <sup>ii</sup>               | 112.26(4) |

|                                           |           |                                            |           |                                        |           |
|-------------------------------------------|-----------|--------------------------------------------|-----------|----------------------------------------|-----------|
| Te3 <sup>ii</sup> —Sr—Te1 <sup>iii</sup>  | 88.51(2)  | Te3 <sup>vi</sup> —Tb—Te2 <sup>iv</sup>    | 89.05(2)  | Te1—Cu—Te3 <sup>ii</sup>               | 109.82(4) |
| Te3 <sup>i</sup> —Sr—Te1 <sup>iv</sup>    | 88.51(2)  | Te3—Tb—Te2 <sup>iii</sup>                  | 92.28(2)  | Te2—Cu—Te3 <sup>i</sup>                | 112.26(4) |
| Te3 <sup>ii</sup> —Sr—Te1 <sup>iv</sup>   | 144.80(5) | Te3 <sup>vi</sup> —Tb—Te2 <sup>iii</sup>   | 89.05(2)  | Te1—Cu—Te3 <sup>i</sup>                | 109.82(4) |
| Te1 <sup>iii</sup> —Sr—Te1 <sup>iv</sup>  | 80.40(3)  | Te2 <sup>iv</sup> —Tb—Te2 <sup>iii</sup>   | 90.26(3)  | Te3 <sup>ii</sup> —Cu—Te3 <sup>i</sup> | 108.34(7) |
| Te3 <sup>i</sup> —Sr—Te2 <sup>iv</sup>    | 81.84(2)  | Te3—Tb—Te1 <sup>vii</sup>                  | 87.95(2)  |                                        |           |
| Te3 <sup>ii</sup> —Sr—Te2 <sup>iv</sup>   | 134.23(4) | Te3 <sup>vi</sup> —Tb—Te1 <sup>vii</sup>   | 90.71(2)  |                                        |           |
| Te1 <sup>iii</sup> —Sr—Te2 <sup>iv</sup>  | 126.73(4) | Te2 <sup>iv</sup> —Tb—Te1 <sup>vii</sup>   | 179.63(3) |                                        |           |
| Te1 <sup>iv</sup> —Sr—Te2 <sup>iv</sup>   | 76.60(2)  | Te2 <sup>iii</sup> —Tb—Te1 <sup>vii</sup>  | 90.01(2)  |                                        |           |
| Te3 <sup>i</sup> —Sr—Te2 <sup>iii</sup>   | 134.23(4) | Te3—Tb—Te1 <sup>viii</sup>                 | 87.95(2)  |                                        |           |
| Te3 <sup>ii</sup> —Sr—Te2 <sup>iii</sup>  | 81.84(2)  | Te3 <sup>vi</sup> —Tb—Te1 <sup>viii</sup>  | 90.71(2)  |                                        |           |
| Te1 <sup>iii</sup> —Sr—Te2 <sup>iii</sup> | 76.60(2)  | Te2 <sup>iv</sup> —Tb—Te1 <sup>viii</sup>  | 90.01(2)  |                                        |           |
| Te1 <sup>iv</sup> —Sr—Te2 <sup>iii</sup>  | 126.73(4) | Te2 <sup>iii</sup> —Tb—Te1 <sup>viii</sup> | 179.63(3) |                                        |           |
| Te2 <sup>iv</sup> —Sr—Te2 <sup>iii</sup>  | 80.00(3)  | Te1 <sup>vii</sup> —Tb—Te1 <sup>viii</sup> | 89.71(3)  |                                        |           |
| Te3 <sup>i</sup> —Sr—Te1 <sup>v</sup>     | 74.59(3)  |                                            |           |                                        |           |
| Te3 <sup>ii</sup> —Sr—Te1 <sup>v</sup>    | 74.59(3)  |                                            |           |                                        |           |
| Te1 <sup>iii</sup> —Sr—Te1 <sup>v</sup>   | 70.21(3)  |                                            |           |                                        |           |
| Te1 <sup>iv</sup> —Sr—Te1 <sup>v</sup>    | 70.21(3)  |                                            |           |                                        |           |
| Te2 <sup>iv</sup> —Sr—Te1 <sup>v</sup>    | 139.33(2) |                                            |           |                                        |           |
| Te2 <sup>iii</sup> —Sr—Te1 <sup>v</sup>   | 139.33(2) |                                            |           |                                        |           |

Symmetry codes: (i)  $-x^{+1/2}, -y, z^{-1/2}$ ; (ii)  $-x^{+1/2}, -y+1, z^{-1/2}$ ; (iii)  $-x^{+1/2}, -y+1, z^{+1/2}$ ; (iv)  $-x^{+1/2}, -y, z^{+1/2}$ ; (v)  $x^{+1/2}, y, -z^{+1/2}$ ; (vi)  $x^{-1/2}, y, -z^{+3/2}$ ; (vii)  $-x, -y+1, -z+1$ ; (viii)  $-x, -y, -z+1$ .

#### SrDyCuTe<sub>3</sub>

|                                          |           |                                            |           |                                        |           |
|------------------------------------------|-----------|--------------------------------------------|-----------|----------------------------------------|-----------|
| Te1 <sup>i</sup> —Sr—Te1 <sup>ii</sup>   | 81.62(4)  | Te1 <sup>v</sup> —Dy—Te1                   | 180.00(3) | Te2—Cu—Te2 <sup>x</sup>                | 104.69(7) |
| Te1 <sup>i</sup> —Sr—Te2 <sup>iii</sup>  | 139.45(2) | Te1 <sup>v</sup> —Dy—Te2 <sup>vi</sup>     | 91.74(2)  | Te2—Cu—Te1 <sup>ii</sup>               | 110.95(1) |
| Te1 <sup>ii</sup> —Sr—Te2 <sup>iii</sup> | 85.41(1)  | Te1—Dy—Te2 <sup>vi</sup>                   | 88.27(2)  | Te2 <sup>x</sup> —Cu—Te1 <sup>ii</sup> | 110.95(1) |
| Te1 <sup>i</sup> —Sr—Te2 <sup>i</sup>    | 85.41(1)  | Te1 <sup>v</sup> —Dy—Te2 <sup>vii</sup>    | 88.27(2)  | Te2—Cu—Te1 <sup>i</sup>                | 110.95(1) |
| Te1 <sup>ii</sup> —Sr—Te2 <sup>i</sup>   | 139.45(2) | Te1—Dy—Te2 <sup>vii</sup>                  | 91.74(2)  | Te2 <sup>x</sup> —Cu—Te1 <sup>i</sup>  | 110.95(1) |
| Te2 <sup>iii</sup> —Sr—Te2 <sup>i</sup>  | 126.63(5) | Te2 <sup>vi</sup> —Dy—Te2 <sup>vii</sup>   | 180.00(2) | Te1 <sup>ii</sup> —Cu—Te1 <sup>i</sup> | 108.36(7) |
| Te1 <sup>i</sup> —Sr—Te2 <sup>iv</sup>   | 85.41(1)  | Te1 <sup>v</sup> —Dy—Te2 <sup>viii</sup>   | 88.27(2)  |                                        |           |
| Te1 <sup>ii</sup> —Sr—Te2 <sup>iv</sup>  | 139.45(2) | Te1—Dy—Te2 <sup>viii</sup>                 | 91.74(2)  |                                        |           |
| Te2 <sup>iii</sup> —Sr—Te2 <sup>iv</sup> | 79.97(2)  | Te2 <sup>vi</sup> —Dy—Te2 <sup>viii</sup>  | 89.82(2)  |                                        |           |
| Te2 <sup>i</sup> —Sr—Te2 <sup>iv</sup>   | 76.75(2)  | Te2 <sup>vii</sup> —Dy—Te2 <sup>viii</sup> | 90.18(2)  |                                        |           |
| Te1 <sup>i</sup> —Sr—Te2 <sup>ii</sup>   | 139.45(2) | Te1 <sup>v</sup> —Dy—Te2 <sup>ix</sup>     | 91.74(2)  |                                        |           |
| Te1 <sup>ii</sup> —Sr—Te2 <sup>ii</sup>  | 85.41(1)  | Te1—Dy—Te2 <sup>ix</sup>                   | 88.27(2)  |                                        |           |
| Te2 <sup>iii</sup> —Sr—Te2 <sup>ii</sup> | 76.75(2)  | Te2 <sup>vi</sup> —Dy—Te2 <sup>ix</sup>    | 90.18(2)  |                                        |           |
| Te2 <sup>i</sup> —Sr—Te2 <sup>ii</sup>   | 79.97(2)  | Te2 <sup>vii</sup> —Dy—Te2 <sup>ix</sup>   | 89.82(2)  |                                        |           |
| Te2 <sup>iv</sup> —Sr—Te2 <sup>ii</sup>  | 126.63(5) | Te2 <sup>viii</sup> —Dy—Te2 <sup>ix</sup>  | 180.00(2) |                                        |           |

Symmetry codes: (i)  $x^{-1/2}, y^{+1/2}, z$ ; (ii)  $x^{+1/2}, y^{+1/2}, z$ ; (iii)  $x^{+1/2}, y^{+1/2}, -z^{+1/2}$ ; (iv)  $x^{-1/2}, y^{+1/2}, -z^{+1/2}$ ; (v)  $-x, -y, -z$ ; (vi)  $-x^{+1/2}, -y^{+1/2}, -z$ ; (vii)  $x^{-1/2}, y^{-1/2}, z$ ; (viii)  $x^{+1/2}, y^{-1/2}, z$ ; (ix)  $-x^{-1/2}, -y^{+1/2}, -z$ ; (x)  $x, y, -z^{+1/2}$ .

#### SrHoCuTe<sub>3</sub>

|                                          |           |                                            |           |                                        |            |
|------------------------------------------|-----------|--------------------------------------------|-----------|----------------------------------------|------------|
| Te1 <sup>i</sup> —Sr—Te1 <sup>ii</sup>   | 81.42(3)  | Te1 <sup>v</sup> —Ho—Te1                   | 180.0     | Te2—Cu—Te2 <sup>x</sup>                | 105.10(5)  |
| Te1 <sup>i</sup> —Sr—Te2 <sup>iii</sup>  | 139.33(2) | Te1 <sup>v</sup> —Ho—Te2 <sup>vi</sup>     | 92.00(1)  | Te2—Cu—Te1 <sup>ii</sup>               | 110.896(7) |
| Te1 <sup>ii</sup> —Sr—Te2 <sup>iii</sup> | 85.505(9) | Te1—Ho—Te2 <sup>vi</sup>                   | 88.00(1)  | Te2 <sup>x</sup> —Cu—Te1 <sup>ii</sup> | 110.896(7) |
| Te1 <sup>i</sup> —Sr—Te2 <sup>i</sup>    | 85.505(9) | Te1 <sup>v</sup> —Ho—Te2 <sup>vii</sup>    | 88.00(1)  | Te2—Cu—Te1 <sup>i</sup>                | 110.896(7) |
| Te1 <sup>ii</sup> —Sr—Te2 <sup>i</sup>   | 139.33(2) | Te1—Ho—Te2 <sup>vii</sup>                  | 92.00(1)  | Te2 <sup>x</sup> —Cu—Te1 <sup>i</sup>  | 110.896(7) |
| Te2 <sup>iii</sup> —Sr—Te2 <sup>i</sup>  | 126.70(3) | Te2 <sup>vi</sup> —Ho—Te2 <sup>vii</sup>   | 180.00(1) | Te1 <sup>ii</sup> —Cu—Te1 <sup>i</sup> | 108.18(5)  |
| Te1 <sup>i</sup> —Sr—Te2 <sup>ii</sup>   | 139.33(2) | Te1 <sup>v</sup> —Ho—Te2 <sup>viii</sup>   | 88.00(1)  |                                        |            |
| Te1 <sup>ii</sup> —Sr—Te2 <sup>ii</sup>  | 85.51(1)  | Te1—Ho—Te2 <sup>viii</sup>                 | 92.00(1)  |                                        |            |
| Te2 <sup>iii</sup> —Sr—Te2 <sup>ii</sup> | 76.97(2)  | Te2 <sup>vi</sup> —Ho—Te2 <sup>viii</sup>  | 89.67(1)  |                                        |            |
| Te2 <sup>i</sup> —Sr—Te2 <sup>ii</sup>   | 79.81(2)  | Te2 <sup>vii</sup> —Ho—Te2 <sup>viii</sup> | 90.33(1)  |                                        |            |
| Te1 <sup>i</sup> —Sr—Te2 <sup>iv</sup>   | 85.505(9) | Te1 <sup>v</sup> —Ho—Te2 <sup>ix</sup>     | 92.00(1)  |                                        |            |
| Te1 <sup>ii</sup> —Sr—Te2 <sup>iv</sup>  | 139.33(2) | Te1—Ho—Te2 <sup>ix</sup>                   | 88.00(1)  |                                        |            |
| Te2 <sup>iii</sup> —Sr—Te2 <sup>iv</sup> | 79.81(2)  | Te2 <sup>vi</sup> —Ho—Te2 <sup>ix</sup>    | 90.33(1)  |                                        |            |
| Te2 <sup>i</sup> —Sr—Te2 <sup>iv</sup>   | 76.97(2)  | Te2 <sup>vii</sup> —Ho—Te2 <sup>ix</sup>   | 89.67(1)  |                                        |            |

|                                                                                                                                                                                                                                                                                                                                             |           |                                           |           |
|---------------------------------------------------------------------------------------------------------------------------------------------------------------------------------------------------------------------------------------------------------------------------------------------------------------------------------------------|-----------|-------------------------------------------|-----------|
| Te2 <sup>ii</sup> —Sr—Te2 <sup>iv</sup>                                                                                                                                                                                                                                                                                                     | 126.70(3) | Te2 <sup>viii</sup> —Ho—Te2 <sup>ix</sup> | 180.00(1) |
| Symmetry codes: (i) $x^{-1/2}, y^{+1/2}, z$ ; (ii) $x^{+1/2}, y^{+1/2}, z$ ; (iii) $x^{+1/2}, y^{+1/2}, -z^{+1/2}$ ; (iv) $x^{-1/2}, y^{+1/2}, -z^{+1/2}$ ; (v) $-x, -y, -z$ ; (vi) $-x^{+1/2}, -y^{+1/2}, -z$ ; (vii) $x^{-1/2}, y^{-1/2}, z$ ; (viii) $x^{+1/2}, y^{-1/2}, z$ ; (ix) $-x^{-1/2}, -y^{+1/2}, -z$ ; (x) $x, y, -z^{+1/2}$ . |           |                                           |           |

**SrErCuTe<sub>3</sub>**

|                                          |           |                                            |           |                                        |            |
|------------------------------------------|-----------|--------------------------------------------|-----------|----------------------------------------|------------|
| Te1 <sup>i</sup> —Sr—Te1 <sup>ii</sup>   | 81.28(3)  | Te1 <sup>v</sup> —Er—Te1                   | 180.0     | Te2 <sup>x</sup> —Cu—Te2               | 105.38(6)  |
| Te1 <sup>i</sup> —Sr—Te2 <sup>iii</sup>  | 139.28(2) | Te1 <sup>v</sup> —Er—Te2 <sup>vi</sup>     | 92.18(1)  | Te2 <sup>x</sup> —Cu—Te1 <sup>ii</sup> | 110.817(9) |
| Te1 <sup>ii</sup> —Sr—Te2 <sup>iii</sup> | 85.63(1)  | Te1—Er—Te2 <sup>vi</sup>                   | 87.82(1)  | Te2—Cu—Te1 <sup>ii</sup>               | 110.817(9) |
| Te1 <sup>i</sup> —Sr—Te2 <sup>i</sup>    | 85.63(1)  | Te1 <sup>v</sup> —Er—Te2 <sup>vii</sup>    | 87.82(1)  | Te2 <sup>x</sup> —Cu—Te1 <sup>i</sup>  | 110.817(9) |
| Te1 <sup>ii</sup> —Sr—Te2 <sup>i</sup>   | 139.28(2) | Te1—Er—Te2 <sup>vii</sup>                  | 92.18(1)  | Te2—Cu—Te1 <sup>i</sup>                | 110.817(9) |
| Te2 <sup>iii</sup> —Sr—Te2 <sup>i</sup>  | 126.62(4) | Te2 <sup>vi</sup> —Er—Te2 <sup>vii</sup>   | 180.00(2) | Te1 <sup>ii</sup> —Cu—Te1 <sup>i</sup> | 108.21(7)  |
| Te1 <sup>i</sup> —Sr—Te2 <sup>ii</sup>   | 139.28(2) | Te1 <sup>v</sup> —Er—Te2 <sup>viii</sup>   | 87.82(1)  |                                        |            |
| Te1 <sup>ii</sup> —Sr—Te2 <sup>ii</sup>  | 85.63(1)  | Te1—Er—Te2 <sup>viii</sup>                 | 92.18(1)  |                                        |            |
| Te2 <sup>iii</sup> —Sr—Te2 <sup>ii</sup> | 77.07(2)  | Te2 <sup>vi</sup> —Er—Te2 <sup>viii</sup>  | 89.54(2)  |                                        |            |
| Te2 <sup>i</sup> —Sr—Te2 <sup>ii</sup>   | 79.64(2)  | Te2 <sup>vii</sup> —Er—Te2 <sup>viii</sup> | 90.46(2)  |                                        |            |
| Te1 <sup>i</sup> —Sr—Te2 <sup>iv</sup>   | 85.63(1)  | Te1 <sup>v</sup> —Er—Te2 <sup>ix</sup>     | 92.18(1)  |                                        |            |
| Te1 <sup>ii</sup> —Sr—Te2 <sup>iv</sup>  | 139.28(2) | Te1—Er—Te2 <sup>ix</sup>                   | 87.82(1)  |                                        |            |
| Te2 <sup>iii</sup> —Sr—Te2 <sup>iv</sup> | 79.64(2)  | Te2 <sup>vi</sup> —Er—Te2 <sup>ix</sup>    | 90.46(2)  |                                        |            |
| Te2 <sup>i</sup> —Sr—Te2 <sup>iv</sup>   | 77.07(2)  | Te2 <sup>vii</sup> —Er—Te2 <sup>ix</sup>   | 89.54(2)  |                                        |            |
| Te2 <sup>ii</sup> —Sr—Te2 <sup>iv</sup>  | 126.62(4) | Te2 <sup>viii</sup> —Er—Te2 <sup>ix</sup>  | 180.00(2) |                                        |            |

|                                                                                                                                                                                                                                                                                                                                             |  |  |  |
|---------------------------------------------------------------------------------------------------------------------------------------------------------------------------------------------------------------------------------------------------------------------------------------------------------------------------------------------|--|--|--|
| Symmetry codes: (i) $x^{-1/2}, y^{+1/2}, z$ ; (ii) $x^{+1/2}, y^{+1/2}, z$ ; (iii) $x^{+1/2}, y^{+1/2}, -z^{+1/2}$ ; (iv) $x^{-1/2}, y^{+1/2}, -z^{+1/2}$ ; (v) $-x, -y, -z$ ; (vi) $-x^{+1/2}, -y^{+1/2}, -z$ ; (vii) $x^{-1/2}, y^{-1/2}, z$ ; (viii) $x^{+1/2}, y^{-1/2}, z$ ; (ix) $-x^{-1/2}, -y^{+1/2}, -z$ ; (x) $x, y, -z^{+1/2}$ . |  |  |  |
|---------------------------------------------------------------------------------------------------------------------------------------------------------------------------------------------------------------------------------------------------------------------------------------------------------------------------------------------|--|--|--|

**SrTmCuTe<sub>3</sub>**

|                                          |           |                                            |           |                                        |            |
|------------------------------------------|-----------|--------------------------------------------|-----------|----------------------------------------|------------|
| Te1 <sup>i</sup> —Sr—Te1 <sup>ii</sup>   | 81.08(3)  | Te1—Tm—Te1 <sup>v</sup>                    | 180.0     | Te2 <sup>x</sup> —Cu—Te2               | 105.66(5)  |
| Te1 <sup>i</sup> —Sr—Te2 <sup>iii</sup>  | 139.20(2) | Te1—Tm—Te2 <sup>vi</sup>                   | 87.69(1)  | Te2 <sup>x</sup> —Cu—Te1 <sup>ii</sup> | 110.746(8) |
| Te1 <sup>ii</sup> —Sr—Te2 <sup>iii</sup> | 85.72(1)  | Te1 <sup>v</sup> —Tm—Te2 <sup>vi</sup>     | 92.31(1)  | Te2—Cu—Te1 <sup>ii</sup>               | 110.746(8) |
| Te1 <sup>i</sup> —Sr—Te2 <sup>i</sup>    | 85.72(1)  | Te1 <sup>v</sup> —Tm—Te2 <sup>viii</sup>   | 87.69(1)  | Te2 <sup>x</sup> —Cu—Te1 <sup>i</sup>  | 110.746(8) |
| Te1 <sup>ii</sup> —Sr—Te2 <sup>i</sup>   | 139.20(2) | Te2 <sup>vi</sup> —Tm—Te2 <sup>viii</sup>  | 89.38(1)  | Te2—Cu—Te1 <sup>i</sup>                | 110.746(8) |
| Te2 <sup>iii</sup> —Sr—Te2 <sup>i</sup>  | 126.64(3) | Te2 <sup>vii</sup> —Tm—Te2 <sup>viii</sup> | 90.62(1)  | Te1 <sup>ii</sup> —Cu—Te1 <sup>i</sup> | 108.21(6)  |
| Te1 <sup>i</sup> —Sr—Te2 <sup>iv</sup>   | 85.72(1)  | Te1—Tm—Te2 <sup>ix</sup>                   | 87.69(1)  |                                        |            |
| Te1 <sup>ii</sup> —Sr—Te2 <sup>iv</sup>  | 139.20(2) | Te1 <sup>v</sup> —Tm—Te2 <sup>ix</sup>     | 92.31(1)  |                                        |            |
| Te2 <sup>iii</sup> —Sr—Te2 <sup>iv</sup> | 79.53(2)  | Te2 <sup>vi</sup> —Tm—Te2 <sup>ix</sup>    | 90.62(1)  |                                        |            |
| Te2 <sup>i</sup> —Sr—Te2 <sup>iv</sup>   | 77.21(2)  | Te2 <sup>vii</sup> —Tm—Te2 <sup>ix</sup>   | 89.38(1)  |                                        |            |
| Te1 <sup>i</sup> —Sr—Te2 <sup>ii</sup>   | 139.20(2) | Te2 <sup>viii</sup> —Tm—Te2 <sup>ix</sup>  | 180.00(1) |                                        |            |
| Te1 <sup>ii</sup> —Sr—Te2 <sup>ii</sup>  | 85.72(1)  |                                            |           |                                        |            |
| Te2 <sup>iii</sup> —Sr—Te2 <sup>ii</sup> | 77.21(2)  |                                            |           |                                        |            |
| Te2 <sup>i</sup> —Sr—Te2 <sup>ii</sup>   | 79.53(2)  |                                            |           |                                        |            |
| Te2 <sup>iv</sup> —Sr—Te2 <sup>ii</sup>  | 126.64(3) |                                            |           |                                        |            |

|                                                                                                                                                                                                                                                                                                                                             |  |  |  |
|---------------------------------------------------------------------------------------------------------------------------------------------------------------------------------------------------------------------------------------------------------------------------------------------------------------------------------------------|--|--|--|
| Symmetry codes: (i) $x^{-1/2}, y^{+1/2}, z$ ; (ii) $x^{+1/2}, y^{+1/2}, z$ ; (iii) $x^{+1/2}, y^{+1/2}, -z^{+1/2}$ ; (iv) $x^{-1/2}, y^{+1/2}, -z^{+1/2}$ ; (v) $-x, -y, -z$ ; (vi) $-x^{+1/2}, -y^{+1/2}, -z$ ; (vii) $x^{-1/2}, y^{-1/2}, z$ ; (viii) $x^{+1/2}, y^{-1/2}, z$ ; (ix) $-x^{-1/2}, -y^{+1/2}, -z$ ; (x) $x, y, -z^{+1/2}$ . |  |  |  |
|---------------------------------------------------------------------------------------------------------------------------------------------------------------------------------------------------------------------------------------------------------------------------------------------------------------------------------------------|--|--|--|

**SrLuCuTe<sub>3</sub>**

|                                          |           |                                            |           |                                        |           |
|------------------------------------------|-----------|--------------------------------------------|-----------|----------------------------------------|-----------|
| Te1 <sup>i</sup> —Sr—Te1 <sup>ii</sup>   | 80.81(4)  | Te1—Lu—Te1 <sup>v</sup>                    | 180.0     | Te2—Cu—Te2 <sup>x</sup>                | 106.36(7) |
| Te1 <sup>i</sup> —Sr—Te2 <sup>iii</sup>  | 139.05(2) | Te1—Lu—Te2 <sup>vi</sup>                   | 87.38(2)  | Te2—Cu—Te1 <sup>ii</sup>               | 110.62(1) |
| Te1 <sup>ii</sup> —Sr—Te2 <sup>iii</sup> | 85.92(1)  | Te1 <sup>v</sup> —Lu—Te2 <sup>vi</sup>     | 92.62(2)  | Te2 <sup>x</sup> —Cu—Te1 <sup>ii</sup> | 110.62(1) |
| Te1 <sup>i</sup> —Sr—Te2 <sup>i</sup>    | 85.92(1)  | Te1—Lu—Te2 <sup>vii</sup>                  | 92.62(2)  | Te2—Cu—Te1 <sup>i</sup>                | 110.62(1) |
| Te1 <sup>ii</sup> —Sr—Te2 <sup>i</sup>   | 139.05(2) | Te1 <sup>v</sup> —Lu—Te2 <sup>vii</sup>    | 87.38(2)  | Te2 <sup>x</sup> —Cu—Te1 <sup>i</sup>  | 110.62(1) |
| Te2 <sup>iii</sup> —Sr—Te2 <sup>i</sup>  | 126.62(5) | Te2 <sup>vi</sup> —Lu—Te2 <sup>vii</sup>   | 180.00(3) | Te1 <sup>ii</sup> —Cu—Te1 <sup>i</sup> | 108.01(7) |
| Te1 <sup>i</sup> —Sr—Te2 <sup>iv</sup>   | 85.92(1)  | Te1—Lu—Te2 <sup>viii</sup>                 | 92.62(2)  |                                        |           |
| Te1 <sup>ii</sup> —Sr—Te2 <sup>iv</sup>  | 139.05(2) | Te1 <sup>v</sup> —Lu—Te2 <sup>viii</sup>   | 87.38(2)  |                                        |           |
| Te2 <sup>iii</sup> —Sr—Te2 <sup>iv</sup> | 79.20(2)  | Te2 <sup>vi</sup> —Lu—Te2 <sup>viii</sup>  | 89.15(2)  |                                        |           |
| Te2 <sup>i</sup> —Sr—Te2 <sup>iv</sup>   | 77.51(2)  | Te2 <sup>vii</sup> —Lu—Te2 <sup>viii</sup> | 90.85(2)  |                                        |           |
| Te1 <sup>i</sup> —Sr—Te2 <sup>ii</sup>   | 139.05(2) | Te1—Lu—Te2 <sup>ix</sup>                   | 87.38(2)  |                                        |           |
| Te1 <sup>ii</sup> —Sr—Te2 <sup>ii</sup>  | 85.92(1)  | Te1 <sup>v</sup> —Lu—Te2 <sup>ix</sup>     | 92.62(2)  |                                        |           |
| Te2 <sup>iii</sup> —Sr—Te2 <sup>ii</sup> | 77.51(2)  | Te2 <sup>vi</sup> —Lu—Te2 <sup>ix</sup>    | 90.845(2) |                                        |           |
| Te2 <sup>i</sup> —Sr—Te2 <sup>ii</sup>   | 79.20(2)  | Te2 <sup>vii</sup> —Lu—Te2 <sup>ix</sup>   | 89.15(2)  |                                        |           |

|                                         |           |                                           |           |
|-----------------------------------------|-----------|-------------------------------------------|-----------|
| Te2 <sup>iv</sup> —Sr—Te2 <sup>ii</sup> | 126.62(5) | Te2 <sup>viii</sup> —Lu—Te2 <sup>ix</sup> | 180.00(2) |
|-----------------------------------------|-----------|-------------------------------------------|-----------|

---

Symmetry codes: (i)  $x^{-1/2}, y^{+1/2}, z$ ; (ii)  $x^{+1/2}, y^{+1/2}, z$ ; (iii)  $x^{+1/2}, y^{+1/2}, -z^{+1/2}$ ; (iv)  $x^{-1/2}, y^{+1/2}, -z^{+1/2}$ ; (v)  $-x, -y, -z$ ; (vi)  $-x^{+1/2}, -y^{+1/2}, -z$ ; (vii)  $x^{-1/2}, y^{-1/2}, z$ ; (viii)  $x^{+1/2}, y^{-1/2}, z$ ; (ix)  $-x^{-1/2}, -y^{+1/2}, -z$ ; (x)  $x, y, -z^{+1/2}$ .

---
